# Supplementary material for: Early Versus Delayed Stroke After Cardiac Surgery: A Systematic Review and Meta‐Analysis
Source: PubMed Central journal article supplement — J Am Heart Assoc. 2019 Jun 19;8(13):e012447. doi: 10.1161/JAHA.119.012447 (PMC6662344; doi:10.1161/jaha.119.012447), 2019-06-19
Supplement: JAH3-8-e012447-s001.pdf [file JAH3-8-e012447-s001.pdf]

# SUPPLEMENTAL MATERIAL

**Table S1.** MOOSE Checklist for Meta-analyses of Observational Studies.

| Item No                                            | Recommendation                                                                                             | Page No. |
|----------------------------------------------------|------------------------------------------------------------------------------------------------------------|----------|
| <b>Reporting of background should include</b>      |                                                                                                            |          |
| 1                                                  | Problem definition                                                                                         | 2        |
| 2                                                  | Hypothesis statement                                                                                       | 2        |
| 3                                                  | Description of study outcome(s)                                                                            | 2        |
| 4                                                  | Type of exposure or intervention used                                                                      | 3        |
| 5                                                  | Type of study designs used                                                                                 | 3        |
| 6                                                  | Study population                                                                                           | 3        |
| <b>Reporting of search strategy should include</b> |                                                                                                            |          |
| 7                                                  | Qualifications of searchers (eg, librarians and investigators)                                             | 3        |
| 8                                                  | Search strategy, including time period included in the synthesis and key words                             | 3        |
| 9                                                  | Effort to include all available studies, including contact with authors                                    | 3        |
| 10                                                 | Databases and registries searched                                                                          | 3        |
| 11                                                 | Search software used, name and version, including special features used (eg, explosion)                    | 3        |
| 12                                                 | Use of hand searching (eg, reference lists of obtained articles)                                           | 3        |
| 13                                                 | List of citations located and those excluded, including justification                                      | 3        |
| 14                                                 | Method of addressing articles published in languages other than English                                    | 3        |
| 15                                                 | Method of handling abstracts and unpublished studies                                                       | 3        |
| 16                                                 | Description of any contact with authors                                                                    | 3        |
| <b>Reporting of methods should include</b>         |                                                                                                            |          |
| 17                                                 | Description of relevance or appropriateness of studies assembled for assessing the hypothesis to be tested | 3        |
| 18                                                 | Rationale for the selection and coding of data (eg, sound clinical principles or convenience)              | 3        |
| 19                                                 | Documentation of how data were classified and coded (eg, multiple raters, blinding and interrater)         | 3        |
| 20                                                 | Assessment of confounding (eg, comparability of cases and controls in studies where appropriate)           | 4        |

|                                                |                                                                                                                                                                                                                                                                              |         |
|------------------------------------------------|------------------------------------------------------------------------------------------------------------------------------------------------------------------------------------------------------------------------------------------------------------------------------|---------|
| 21                                             | Assessment of study quality, including blinding of quality assessors, stratification or regression on possible predictors of study results                                                                                                                                   | 4       |
| 22                                             | Assessment of heterogeneity                                                                                                                                                                                                                                                  | 5       |
| 23                                             | Description of statistical methods (eg, complete description of fixed or random effects models, justification of whether the chosen models account for predictors of study results, dose-response models, or cumulative meta-analysis) in sufficient detail to be replicated | 4       |
| 24                                             | Provision of appropriate tables and graphics                                                                                                                                                                                                                                 | 5       |
| <b>Reporting of results should include</b>     |                                                                                                                                                                                                                                                                              |         |
| 25                                             | Graphic summarizing individual study estimates and overall estimate                                                                                                                                                                                                          | Figures |
| 26                                             | Table giving descriptive information for each study included                                                                                                                                                                                                                 | Tables  |
| 27                                             | Results of sensitivity testing (eg, subgroup analysis)                                                                                                                                                                                                                       | 6-7     |
| 28                                             | Indication of statistical uncertainty of findings                                                                                                                                                                                                                            | 6-7     |
| 29                                             | Quantitative assessment of bias (eg, publication bias)                                                                                                                                                                                                                       | 6-7     |
| 30                                             | Justification for exclusion (eg, exclusion of non-English language citations)                                                                                                                                                                                                | 6-7     |
| 31                                             | Assessment of quality of included studies                                                                                                                                                                                                                                    | 6-7     |
| <b>Reporting of conclusions should include</b> |                                                                                                                                                                                                                                                                              |         |
| 32                                             | Consideration of alternative explanations for observed results                                                                                                                                                                                                               | 8-11    |
| 33                                             | Generalization of the conclusions (ie, appropriate for the data presented and within the domain of the literature review)                                                                                                                                                    | 8-11    |
| 34                                             | Guidelines for future research                                                                                                                                                                                                                                               | 8-11    |
| 35                                             | Disclosure of funding source                                                                                                                                                                                                                                                 | 12      |

From: Stroup DF, Berlin JA, Morton SC, for the Meta-analysis Of Observational Studies in Epidemiology (MOOSE) Group. Meta-analysis of Observational Studies in Epidemiology. A Proposal for Reporting. JAMA. 2000;283:2008-2012.

**Table S2.** The Search Strategy for Ovid MEDLINE.

|                                                                                                                                        |                                                                                                                                                                                                                                                                                                                                                                                                                                                                                                                                                                                                                                                                                                                                                                                                                                                                                                                                                                                                                                                                                                                                                                                                                                                                                                                                                                                                                                                                            |
|----------------------------------------------------------------------------------------------------------------------------------------|----------------------------------------------------------------------------------------------------------------------------------------------------------------------------------------------------------------------------------------------------------------------------------------------------------------------------------------------------------------------------------------------------------------------------------------------------------------------------------------------------------------------------------------------------------------------------------------------------------------------------------------------------------------------------------------------------------------------------------------------------------------------------------------------------------------------------------------------------------------------------------------------------------------------------------------------------------------------------------------------------------------------------------------------------------------------------------------------------------------------------------------------------------------------------------------------------------------------------------------------------------------------------------------------------------------------------------------------------------------------------------------------------------------------------------------------------------------------------|
| Ovid MEDLINE® (Epub Ahead of Print, In-Process & Other Non-Indexed Citations, Ovid MEDLINE® Daily and Ovid MEDLINE® - 1946 to Present) |                                                                                                                                                                                                                                                                                                                                                                                                                                                                                                                                                                                                                                                                                                                                                                                                                                                                                                                                                                                                                                                                                                                                                                                                                                                                                                                                                                                                                                                                            |
| Line #                                                                                                                                 | Search term (Searched on 04/11/2018)                                                                                                                                                                                                                                                                                                                                                                                                                                                                                                                                                                                                                                                                                                                                                                                                                                                                                                                                                                                                                                                                                                                                                                                                                                                                                                                                                                                                                                       |
| 1                                                                                                                                      | (Intraoperative Complications/ or Postoperative Complications/) and exp Stroke/                                                                                                                                                                                                                                                                                                                                                                                                                                                                                                                                                                                                                                                                                                                                                                                                                                                                                                                                                                                                                                                                                                                                                                                                                                                                                                                                                                                            |
| 2                                                                                                                                      | ((intraoperative or intra-operative or peroperative or per-operative or perioperative or peri-operative or early or postoperative or post-operative or post-surgical or postsurgical or delayed) adj4 (stroke or strokes or cerebrovascular accident* or cerebrovascular accident* or CVA or CVAs or apoplexy or apoplexia or brain vascular accident* or vascular brain accident* or acute cerebrovascular lesion or acute focal cerebral vasculopathy or brain blood flow disturbance or brain accident or brain attack or brain insult or brain insultus or brain ischaemic attack or brain ischemic attack or cerebral insult cerebral vascular accident or cerebral vascular insufficiency or cerebrovascular arrestor cerebrovascular failure or cerebrovascular injury or cerebrovascular insufficiency or cerebrovascular insult or ischaemic cerebral attack or ischaemic seizure or ischemic cerebral attack or ischemic seizure or brain infarction* or brain venous infarction* or cortical infarction or hemisphere infarct* or hemispheric infarct* or brain stem infarction* or brainstem infarction* or Claude Syndrome or Weber Syndrome or Millard-Gublar Syndrome or Top of the Basilar Syndrome or Benedict Syndrome or Foville Syndrome or cerebral infarct* or cerebrovascular infarct* or subcortical infarction* or posterior choroidal artery infarction* or anterior choroidal artery infarction* or lacunar syndrome* or lacunar infarct*)).tw. |
| 3                                                                                                                                      | 1 or 2                                                                                                                                                                                                                                                                                                                                                                                                                                                                                                                                                                                                                                                                                                                                                                                                                                                                                                                                                                                                                                                                                                                                                                                                                                                                                                                                                                                                                                                                     |
| 4                                                                                                                                      | Cardiac Surgical Procedures/                                                                                                                                                                                                                                                                                                                                                                                                                                                                                                                                                                                                                                                                                                                                                                                                                                                                                                                                                                                                                                                                                                                                                                                                                                                                                                                                                                                                                                               |

|    |                                                                                                                                                                                                                                                                                                                                                                                                                                                                                                                                                                                                                                                                                                                                                                                                                                                        |
|----|--------------------------------------------------------------------------------------------------------------------------------------------------------------------------------------------------------------------------------------------------------------------------------------------------------------------------------------------------------------------------------------------------------------------------------------------------------------------------------------------------------------------------------------------------------------------------------------------------------------------------------------------------------------------------------------------------------------------------------------------------------------------------------------------------------------------------------------------------------|
| 5  | (cardiac surgery or cardiac surgical procedure* or heart surgery or heart valve surgery or heart surgical procedures* or cardiac operation* or heart operation* or cardiosurgery or myocardial resection).tw.                                                                                                                                                                                                                                                                                                                                                                                                                                                                                                                                                                                                                                          |
| 6  | Coronary Artery Bypass/                                                                                                                                                                                                                                                                                                                                                                                                                                                                                                                                                                                                                                                                                                                                                                                                                                |
| 7  | (CABG or aortic coronary bypass or aorticocoronary anastomosis or Total arterial revascularization or total arterial revascularisation or Multiple arterial revascularization or multiple arterial revascularisation).tw.                                                                                                                                                                                                                                                                                                                                                                                                                                                                                                                                                                                                                              |
| 8  | ((aortocoronary or aorta or coronary) adj2 (anastomosis or bypass or shunt or graft)).tw.                                                                                                                                                                                                                                                                                                                                                                                                                                                                                                                                                                                                                                                                                                                                                              |
| 9  | Coronary Artery Bypass, Off Pump/                                                                                                                                                                                                                                                                                                                                                                                                                                                                                                                                                                                                                                                                                                                                                                                                                      |
| 10 | Internal Mammary-Coronary Artery Anastomosis/                                                                                                                                                                                                                                                                                                                                                                                                                                                                                                                                                                                                                                                                                                                                                                                                          |
| 11 | Myocardial Revascularization/                                                                                                                                                                                                                                                                                                                                                                                                                                                                                                                                                                                                                                                                                                                                                                                                                          |
| 12 | (cardiac muscle revascularisation or cardiac muscle revascularization or coronary revascularisation or coronary revascularization or heart muscle revascularisation or heart myocardium revascularisation or heart revascularisation or heart revascularization or internal mammary arterial anastomosis or internal mammary arterial implantation or internal mammary artery anastomosis or internal mammary artery graft or internal mammary artery implant or internal mammary artery implantation or internal mammary-coronary artery anastomosis or Coronary Internal Mammary Artery Anastomosis or myocardial revascularisation or myocardial revascularization or myocardium revascularisation or myocardium revascularization or transmyocardial laser revascularisation or transmyocardial laser revascularization or vineberg operation).tw. |
| 13 | (Aortic Valve Repair or Aortic Valve Replacement or aorta valve replacement or aorta valve transplantation or aortic valve transplantation or aortic valve xenotransplantation).tw.                                                                                                                                                                                                                                                                                                                                                                                                                                                                                                                                                                                                                                                                    |
| 14 | Cardiac Valve Annuloplasty/                                                                                                                                                                                                                                                                                                                                                                                                                                                                                                                                                                                                                                                                                                                                                                                                                            |

|    |                                                                                                                                                                                                                                                                                                                                                                                                                      |
|----|----------------------------------------------------------------------------------------------------------------------------------------------------------------------------------------------------------------------------------------------------------------------------------------------------------------------------------------------------------------------------------------------------------------------|
| 15 | (Cardiac Valve Annuloplasty or Cardiac Valve Annuloplasties or Valvular Annuloplasties or Valvular Annuloplasty or Heart Valve Annuloplasty or Heart Valve Annuloplasties or Cardiac Valve Annulus Repair or Heart Valve Annulus Repair or Cardiac Valve Annular Repair or Heart Valve Annular Repair or Cardiac Valve Annular Reduction or Cardiac Valve Annulus Shortening or Cardiac Valve Annulus Reduction).tw. |
| 16 | Mitral Valve Annuloplasty/                                                                                                                                                                                                                                                                                                                                                                                           |
| 17 | (Mitral Valve Annuloplasties or Mitral Valve Annuloplasty or Mitral Annuloplasty Mitral Annuloplasties or Mitral Valve Annulus Repair or mitral valve surgery or mitral valve replacement or mitral valve repair).tw.                                                                                                                                                                                                |
| 18 | Heart Valve Prosthesis Implantation/                                                                                                                                                                                                                                                                                                                                                                                 |
| 19 | heart valve prosthesis implantation.tw.                                                                                                                                                                                                                                                                                                                                                                              |
| 20 | or/4-19                                                                                                                                                                                                                                                                                                                                                                                                              |
| 21 | 3 and 20                                                                                                                                                                                                                                                                                                                                                                                                             |
| 22 | limit 21 to English language                                                                                                                                                                                                                                                                                                                                                                                         |

Table S3. Critical Appraisal of Included Studies Using the Newcastle-Ottawa Quality Assessment Scale for Cohort Studies.

| Study/Year                    | Selection | Comparability | Outcome/Exposure | Total Score |
|-------------------------------|-----------|---------------|------------------|-------------|
| Blossom 1992 <sup>1</sup>     | ****      | *             | **               | *****       |
| Boivie 2005 <sup>2</sup>      | ****      | *             | **               | *****       |
| Borger 2001 <sup>3</sup>      | ****      | *             | **               | *****       |
| Bull 1993 <sup>4</sup>        | ****      | *             | **               | *****       |
| Calafiore 2002 <sup>5</sup>   | ****      | **            | **               | *****       |
| Cao 2011 <sup>6</sup>         | ****      | *             | *                | *****       |
| Carrascal 2014 <sup>7</sup>   | ****      | **            | **               | *****       |
| Chen 2015 <sup>8</sup>        | ****      | *             | **               | *****       |
| Doi 2010 <sup>9</sup>         | ****      | **            | *                | *****       |
| Fessatidis 1991 <sup>10</sup> | ****      | *             | **               | *****       |
| Filsoufi.A 2008 <sup>11</sup> | ****      | **            | **               | *****       |
| Filsoufi.B 2008 <sup>12</sup> | ****      | **            | **               | *****       |
| Gaudino 1999 <sup>13</sup>    | ****      | *             | **               | *****       |
| Goto 2003 <sup>14</sup>       | ****      | *             | **               | *****       |
| Hedberg 2005 <sup>15</sup>    | ****      | *             | *                | *****       |
| Hedberg 2011 <sup>16</sup>    | ****      | **            | **               | *****       |
| Hedberg 2013 <sup>17</sup>    | ****      | **            | *                | *****       |
| Hogue 1999 <sup>18</sup>      | ****      | **            | **               | *****       |
| Imasaka 2018 <sup>19</sup>    | ****      | **            | *                | *****       |
| Karhausen 2017 <sup>20</sup>  | ****      | **            | **               | *****       |
| Karkouti 2005 <sup>21</sup>   | ****      | **            | *                | *****       |
| Kinnunen 2015 <sup>22</sup>   | ****      | **            | **               | *****       |
| Lahtinen 2004 <sup>23</sup>   | ****      | *             | **               | *****       |
| Lee 2011 <sup>24</sup>        | ****      | **            | *                | *****       |
| Lisle 2008 <sup>25</sup>      | ****      | **            | **               | *****       |
| Martin 1982 <sup>26</sup>     | ****      | *             | **               | *****       |
| Marui 2012 <sup>27</sup>      | ****      | **            | **               | *****       |
| Murdock 2003 <sup>28</sup>    | ****      | *             | **               | *****       |
| Nishiyama 2009 <sup>29</sup>  | ****      | **            | **               | *****       |

---

|                                 |      |    |    |       |
|---------------------------------|------|----|----|-------|
| Peel 2004 <sup>30</sup>         | **** | *  | *  | ***** |
| Ridderstolpe 2002 <sup>31</sup> | **** | ** | ** | ***** |
| Salazar 2001 <sup>32</sup>      | **** | *  | ** | ***** |
| Tarakji 2011 <sup>33</sup>      | **** | ** | ** | ***** |
| Toumpoulis 2008 <sup>34</sup>   | **** | ** | ** | ***** |
| Weinstein 2001 <sup>35</sup>    | **** | *  | *  | ***** |
| Wijdicks 1996 <sup>36</sup>     | **** | *  | ** | ***** |

---



**Table S4.** Stroke Definitions in the Included Studies.

|                                                                                                                                                                                                                                                                |
|----------------------------------------------------------------------------------------------------------------------------------------------------------------------------------------------------------------------------------------------------------------|
| <ul style="list-style-type: none"> <li>• In 23 studies, early strokes were defined as strokes observed at awaking or extubation, while delayed strokes were defined as strokes occurring after a symptom-free interval after awaking or extubation.</li> </ul> |
| <ul style="list-style-type: none"> <li>• In 7 studies, early strokes were defined as strokes that occurred within 24 hours after cardiac surgery, while delayed strokes after 24 hours.</li> </ul>                                                             |
| <ul style="list-style-type: none"> <li>• In 2 studies, early were strokes occurring intraoperatively, while delayed were those occurring postoperatively</li> </ul>                                                                                            |
| <ul style="list-style-type: none"> <li>• In 1 early strokes were defined as stroke at recovering from anesthesia or within 12h, while delayed strokes were defined as strokes occurring after 12 hours</li> </ul>                                              |
| <ul style="list-style-type: none"> <li>• In 1 study early strokes were strokes occurring by 1<sup>st</sup> POD, while delayed strokes were defined as strokes occurring between POD 2 and 30.</li> </ul>                                                       |
| <ul style="list-style-type: none"> <li>• In 1 study early strokes were strokes presenting on day 0, while delayed strokes were defined as strokes occurring afterwards</li> </ul>                                                                              |
| <ul style="list-style-type: none"> <li>• In 1 study early strokes were strokes presenting within 3<sup>rd</sup> POD, while delayed strokes were defined as strokes occurring afterwards</li> </ul>                                                             |

POD, Post-operative day

Table S5. Demographics of the included studies.

| Study/Year                    | Cohort | Age (Yr) | Females (%) | DM (%) | AF (%) | Carotid disease (%) | Prior Stroke (%) | Urgent/ Emergent (%) | PVD (%) | CKD (%) | Redo (%) | Type of Surgery (%)                            |
|-------------------------------|--------|----------|-------------|--------|--------|---------------------|------------------|----------------------|---------|---------|----------|------------------------------------------------|
| Blossom 1992 <sup>1</sup>     | 3428   | NR       | NR          | NR     | NR     | NR                  | NR               | NR                   | NR      | NR      | NR       | CABG                                           |
| Bovie 2005 <sup>2</sup>       | 2641   | 66       | 27          | NR     | NR     | NR                  | NR               | NR                   | 3       | NR      | NR       | CABG 1882; Valve 195; CABG+Valve 200           |
| Borger 2001 <sup>3</sup>      | 6682   | 62       | 20          | 24     | 1      | NR                  | 8                | 17                   | 14      | 3       | 8        | CABG                                           |
| Bull 1993 <sup>4</sup>        | 245    | NR       | NR          | 21     | 6      | 11                  | 12               | NR                   | NR      | NR      | NR       | CABG                                           |
| Calafiore 2002 <sup>5</sup>   | 4875   | NR       | NR          | NR     | NR     | NR                  | NR               | NR                   | NR      | NR      | NR       | CABG                                           |
| Cao 2011 <sup>6</sup>         | 430    | 64       | 24          | 37     | 3      | NR                  | 100              | NR                   | 3       | NR      | NR       | CABG                                           |
| Carrascal 2014 <sup>7</sup>   | 844    | 74       | 40          | 20     | NR     | NR                  | 8                | 6                    | 10      | 7       | 6        | CABG 202; CABG+Valve 209; Valve 403; Aortic 32 |
| Chen 2015 <sup>8</sup>        | 1010   | 67       | 15          | NR     | NR     | NR                  | NR               | 27                   | NR      | NR      | NR       | CABG                                           |
| Doi 2010 <sup>9</sup>         | 611    | 68       | 22          | 46     | NR     | NR                  | NR               | NR                   | NR      | 15      | NR       | CABG                                           |
| Fessatidis 1991 <sup>10</sup> | 1487   | NR       | NR          | NR     | NR     | NR                  | NR               | NR                   | NR      | NR      | NR       | CABG 943; Valve 496; Congenital 46             |
| Filsoufi.A 2008 <sup>11</sup> | 2808   | 63       | 43          | 15     | NR     | NR                  | 7                | 3                    | 7       | 5       | 19       | CABG+Valve 1529; Valve 1279                    |
| Filsoufi.B 2008 <sup>12</sup> | 2985   | 65       | 31          | 40     | NR     | NR                  | 8                | 5                    | 13      | 5       | 4        | CABG                                           |
| Gaudino 1999 <sup>13</sup>    | 2987   | 60       | 44          | 18     | NR     | NR                  | 11               | NR                   | NR      | NR      | NR       | CABG                                           |
| Goto 2003 <sup>14</sup>       | 463    | 70       | 31          | 35     | NR     | NR                  | 17               | NR                   | 10      | 11      | NR       | CABG                                           |
| Hedberg 2005 <sup>15</sup>    | 2641   | NR       | NR          | NR     | NR     | NR                  | NR               | NR                   | NR      | NR      | NR       | All Cardiac Surgery                            |
| Hedberg 2011 <sup>16</sup>    | 9122   | 68       | 25          | 22     | NR     | NR                  | 9                | NR                   | NR      | NR      | 5        | CABG 8136; CABG+Valve 986                      |

|                                           |       |    |    |    |    |    |    |    |    |    |    |                                                                    |
|-------------------------------------------|-------|----|----|----|----|----|----|----|----|----|----|--------------------------------------------------------------------|
| <b>Hedberg 2013<sup>17</sup></b>          | 10809 | NR | 28 | 20 | 4  | NR | 9  | NR | 9  | NR | 5  | All But Aortic 98,5%;<br>Aortic 1.5%                               |
| <b>Hogue 1999<sup>18</sup></b>            | 2972  | 68 | 36 | 28 | NR | 32 | 7  | NR | NR | NR | NR | CABG (88.4);<br>CABG/valve (15.0);<br>Valve (26.6)                 |
| <b>Imasaka 2018<sup>19</sup></b>          | 1134  | NR | 39 | 31 | 16 | 14 | 14 | NR | NR | 7  | 4  | CABG 378;<br>CABG+Valve 151;<br>Valve 480; Aortic 43;<br>Other 82  |
| <b>Karhausen 2017<sup>20</sup></b>        | 6130  | NR | 28 | 38 | NR | NR | 10 | NR | NR | 6  | 2  | CABG                                                               |
| <b>Karkouti 2005<sup>21</sup></b>         | 10949 | NR | All Cardiac Surgery                                                |
| <b>Kinnunen 2015<sup>22</sup></b>         | 1314  | 66 | 21 | 29 | 11 | NR | 4  | 56 | 12 | NR | 1  | CABG                                                               |
| <b>Lahtinen 2004<sup>23</sup></b>         | 2630  | NR | 33 | 31 | 10 | NR | 36 | 1  | NR | NR | NR | CABG                                                               |
| <b>Lee 2011<sup>24</sup></b>              | 1367  | 63 | 26 | 44 | 4  | NR | 9  | NR | 2  | 7  | NR | CABG                                                               |
| <b>Lisle 2008<sup>25</sup></b>            | 7201  | NR | All Cardiac Surgery                                                |
| <b>Martin 1982<sup>26</sup></b>           | 253   | 54 | 83 | 5  | 8  | NR | 6  | NR | 7  | NR | NR | CABG                                                               |
| <b>Marui 2012<sup>27</sup></b>            | 2446  | 67 | 28 | 47 | 6  | 11 | 21 | 6  | NR | 39 | NR | CABG                                                               |
| <b>Murdock 2003<sup>28</sup></b>          | 2104  | 60 | 50 | 46 | 6  | NR | 22 | NR | 30 | NR | NR | CABG 1798, Valve<br>135, CABG+Valve<br>151, Other 20               |
| <b>Nishiyama 2009<sup>29</sup></b>        | 2516  | 67 | 28 | 46 | 6  | NR | 22 | 6  | 20 | 17 | 0  | CABG                                                               |
| <b>Peel 2004<sup>30</sup></b>             | 10573 | NR | CABG                                                               |
| <b>Ridderstolpe<br/>2002<sup>31</sup></b> | 3282  | 66 | 27 | 14 | NR | NR | 8  | 3  | 7  | NR | 0  | CABG 2290,<br>CABG+Valve 275,<br>Valve 570, Aortic 60,<br>Other 87 |
| <b>Salazar 2001<sup>32</sup></b>          | 5971  | NR | CABG 3,974; Valve<br>828; CABG/valve 463;                          |

---

|                                         |       |    |    |    |    |    |    |    |    |    |    |      | CABG/CEA 52;<br>CABG/Other 76;<br>Aortic 310;<br>Transplant 94; Other<br>174 |
|-----------------------------------------|-------|----|----|----|----|----|----|----|----|----|----|------|------------------------------------------------------------------------------|
| <b>Tarakji 2011<sup>33</sup></b>        | 45432 | 68 | 21 | 23 | 2  | NR | 6  | 3  | 16 | 3  | 19 | CABG |                                                                              |
| <b>Toumpoulis<br/>2008<sup>34</sup></b> | 4140  | 64 | 31 | 35 | NR | 6  | 7  | 70 | NR | 3  | NR | CABG |                                                                              |
| <b>Weinstein 2001<sup>35</sup></b>      | 2217  | 71 | 35 | 33 | 19 | NR | NR | NR | 6  | NR | NR | CABG |                                                                              |
| <b>Wijdicks 1996<sup>36</sup></b>       | 8270  | NR | CABG |                                                                              |

---

DM, diabetes mellitus; CKD, chronic kidney disease; PVD, peripheral vascular disease; CABG, coronary artery bypass graft; CEA, carotid endarterectomy; NR, not reported.

Table S6. Summary of the outcomes (fixed effect model).

| Outcomes                                                                  | No. of Studies | Proportion [Confidence interval] | Heterogeneity (I <sup>2</sup> , P-value) | Perioperative stroke vs No stroke ¶ | Early vs delayed stroke difference ¶¶ |
|---------------------------------------------------------------------------|----------------|----------------------------------|------------------------------------------|-------------------------------------|---------------------------------------|
| <b>FIXED EFFECT MODEL</b>                                                 |                |                                  |                                          |                                     |                                       |
| Pooled rate of perioperative stroke                                       | 36             | 2.15% [2.08; 2.22]               | 94.1%, P<0.0001                          | ----                                | ----                                  |
| Pooled rate of early stroke                                               | 36             | 1.25% [1.19; 1.30]               | 94.7%, P<0.0001                          | ----                                | <0.0001                               |
| Pooled rate of delayed stroke                                             | 36             | 1.08% [1.03; 1.14]               | 91.5%, P<0.0001                          | ----                                | <0.0001                               |
| Pooled rate of operative mortality in the whole group                     | 20             | 3.39% [3.28; 3.50]               | 96.9%, P<0.0001                          | ----                                | ----                                  |
| Pooled rate of operative mortality for patients with perioperative stroke | 22             | 20.76% [19.12; 22.49]            | 58.8%, P=0.0003                          | <0.0001                             | ----                                  |
| Pooled rate of operative mortality for patients without stroke            | 16             | 3.19% [3.08; 3.31]               | 96.9%, P<0.0001                          | <0.0001                             | ----                                  |
| Pooled rate of operative mortality for patients with early stroke         | 12             | 25.97% [21.80; 30.62]            | 84.2%, P<0.0001                          | ----                                | 0.0049                                |
| Pooled rate of operative mortality for patients with late stroke          | 13             | 17.85% [14.57; 21.67]            | 20.1%, P=0.2407                          | ----                                | 0.0049                                |
| Incidence rate of late mortality in the all group                         | 5              | 5.78% [5.71; 5.84]               | 99.3%, P<0.0001                          | ----                                | ----                                  |
| Incidence rate of late mortality in patients with perioperative stroke    | 5              | 8.44% [7.83; 9.10]               | 84.8%, P< 0.0001                         | <0.0001                             | ----                                  |
| Incidence rate of late mortality in patients without stroke               | 8              | 5.37% [5.32; 5.43]               | 99.7%, P=0                               | <0.0001                             | ----                                  |
| Incidence rate of late mortality in patients with early stroke            | 5              | 8.64% [7.49; 9.95]               | 87.6%, P< 0.0001                         | ----                                | 0.3738                                |
| Incidence rate of late mortality in patients with delayed stroke          | 5              | 7.73% [6.34; 9.43]               | 71.2%, P=0.008                           | ----                                | 0.3738                                |

¶ P value for subgroup difference

**Table S7.** Meta-Regression for Early and Delayed Stroke (Restricted maximum likelihood model). By getting exponential of Beta (exp Beta):

- 1%↑ in prior stroke history → ↑ absolute risk of peri-operative stroke by 1.01%, P=0.001
- 1%↑ in on-pump → ↑ absolute risk of early stroke by 1.00%, P=0.006
- 1%↑ in in off-pump → ↓ absolute risk of early stroke by 0.99%, P=0.012
- 1%↑ in in prior stroke history → ↑ absolute risk of delayed stroke by 1.02%, P<0.001)

| Perioperative Stroke                    | Beta ±SD (P-value)             | Exp (Beta)   |
|-----------------------------------------|--------------------------------|--------------|
| Age (years)                             | 0.0041±0.0265, P=0.8774        | 1.004        |
| Female (%)                              | 0.0071±0.0076, P=0.3527        | 1.007        |
| Diabetes (%)                            | 0.0015±0.0080, P=0.8470        | 1.002        |
| AF (%)                                  | -0.0111±0.0246, P=0.6530       | 0.989        |
| Carotid disease (%)                     | -0.0220 0.0144, P=0.1271       | 0.978        |
| Prior stroke (%)                        | <b>0.0129±0.0040, P=0.0014</b> | <b>1.013</b> |
| Urgent or Emergent Procedure (%)        | 0.0043±0.0041, P=0.2957        | 1.004        |
| On-pump (%)                             | 0.0017±0.0025, P=0.4927        | 1.002        |
| Off-pump (%)                            | -0.0014±0.0028, P=0.6152       | 0.999        |
| Single clamp (%)                        | 0.0034±0.0055, P=0.5385        | 1.003        |
| Multiple clamp (%)                      | -0.0034±0.0055, P=0.5385       | 0.997        |
| Asc Aorta atheroma or calcification (%) | 0.0017±0.0065, P=0.7927        | 1.002        |
| Use of circulatory arrest (%)           | NA (no enough study)           | NA           |
| CPB time (in minutes)                   | 0.0007±0.0030, P=0.8220        | 1.001        |
| Aortic clamp time (in minutes)          | 0.0002±0.0038, P=0.9522        | 1.000        |
| Early Stroke                            | Beta ±SD (P-value)             | Exp (Beta)   |
| Age (years)                             | 0.0158±0.0318, P=0.6202        | 1.016        |
| Female (%)                              | 0.0074±0.0102, P=0.4687        | 1.007        |
| Diabetes (%)                            | -0.0178±0.0097, P= 0.0678      | 0.982        |
| AF (%)                                  | -0.0153±0.0240, P=0.5256       | 0.985        |
| Carotid disease (%)                     | -0.0473±0.0252, P=0.0600       | 0.954        |
| Prior stroke (%)                        | -0.0046±0.0072, P=0.5244       | 0.995        |
| Urgent or Emergent Procedure (%)        | 0.0056±0.0074, P=0.4508        | 1.006        |
| On-pump (%)                             | <b>0.0091±0.0034, P=0.0064</b> | <b>1.009</b> |

|                                         |                                  |                   |
|-----------------------------------------|----------------------------------|-------------------|
| Off-pump (%)                            | <b>-0.0097±0.0038, P=0.0115</b>  | 0.990             |
| Single clamp (%)                        | 0.0012 0.0087, P=0.8874          | 1.001             |
| Multiple clamp (%)                      | -0.0012±0.0087, P=0.8874         | 0.999             |
| Asc Aorta atheroma or calcification (%) | 0.0005±0.0115, P=0.9634          | 1.001             |
| Use of circulatory arrest (%)           | NA (no enough studies)           | NA                |
| CPB time (in minutes)                   | -0.0030±0.0047, P=0.5267         | 0.997             |
| Aortic clamp time (in minutes)          | -0.0035±0.0059, P=0.5600         | 0.997             |
| <b>Delayed Stroke</b>                   | <b>Beta ±SD (P-value)</b>        | <b>Exp (Beta)</b> |
| Age (years)                             | 0.0108 0.0420, P=0.7982          | 1.011             |
| Female (%)                              | 0.0087±0.0115, P=0.4502          | 1.009             |
| Diabetes (%)                            | 0.0233±0.0120, P=0.0523          | 1.024             |
| AF (%)                                  | 0.0193±0.0465, P=0.6782          | 1.019             |
| Carotid disease (%)                     | 0.0059±0.0091, P=0.5185          | 1.006             |
| Prior stroke (%)                        | <b>0.0224±0.0056, P&lt;.0001</b> | <b>1.023</b>      |
| Urgent or Emergent Procedure (%)        | 0.0005±0.0077, P=0.9510          | 1.001             |
| On-pump (%)                             | -0.0057±0.0036, P=0.1166         | 0.994             |
| Off-pump (%)                            | 0.0062±0.0039, P=0.1103          | 1.006             |
| Single clamp (%)                        | 0.0041±0.0091, P=0.6511          | 1.004             |
| Multiple clamp (%)                      | -0.0041±0.0091, P=0.6511         | 0.996             |
| Asc Aorta atheroma or calcification (%) | 0.0010±0.0045, P=0.8213          | 1.001             |
| Use of circulatory arrest (%)           | NA (no enough studies)           | NA                |
| CPB time (in minutes)                   | 0.0065±0.0050, P=0.1943          | 1.007             |
| Aortic clamp time (in minutes)          | 0.0062±0.0064, P=0.3356          | 1.006             |

AF, Atrial Fibrillation; Asc, ascending; CPB, cardiopulmonary bypass; NA, not applies.

Figure S1. PRISMA flowchart.

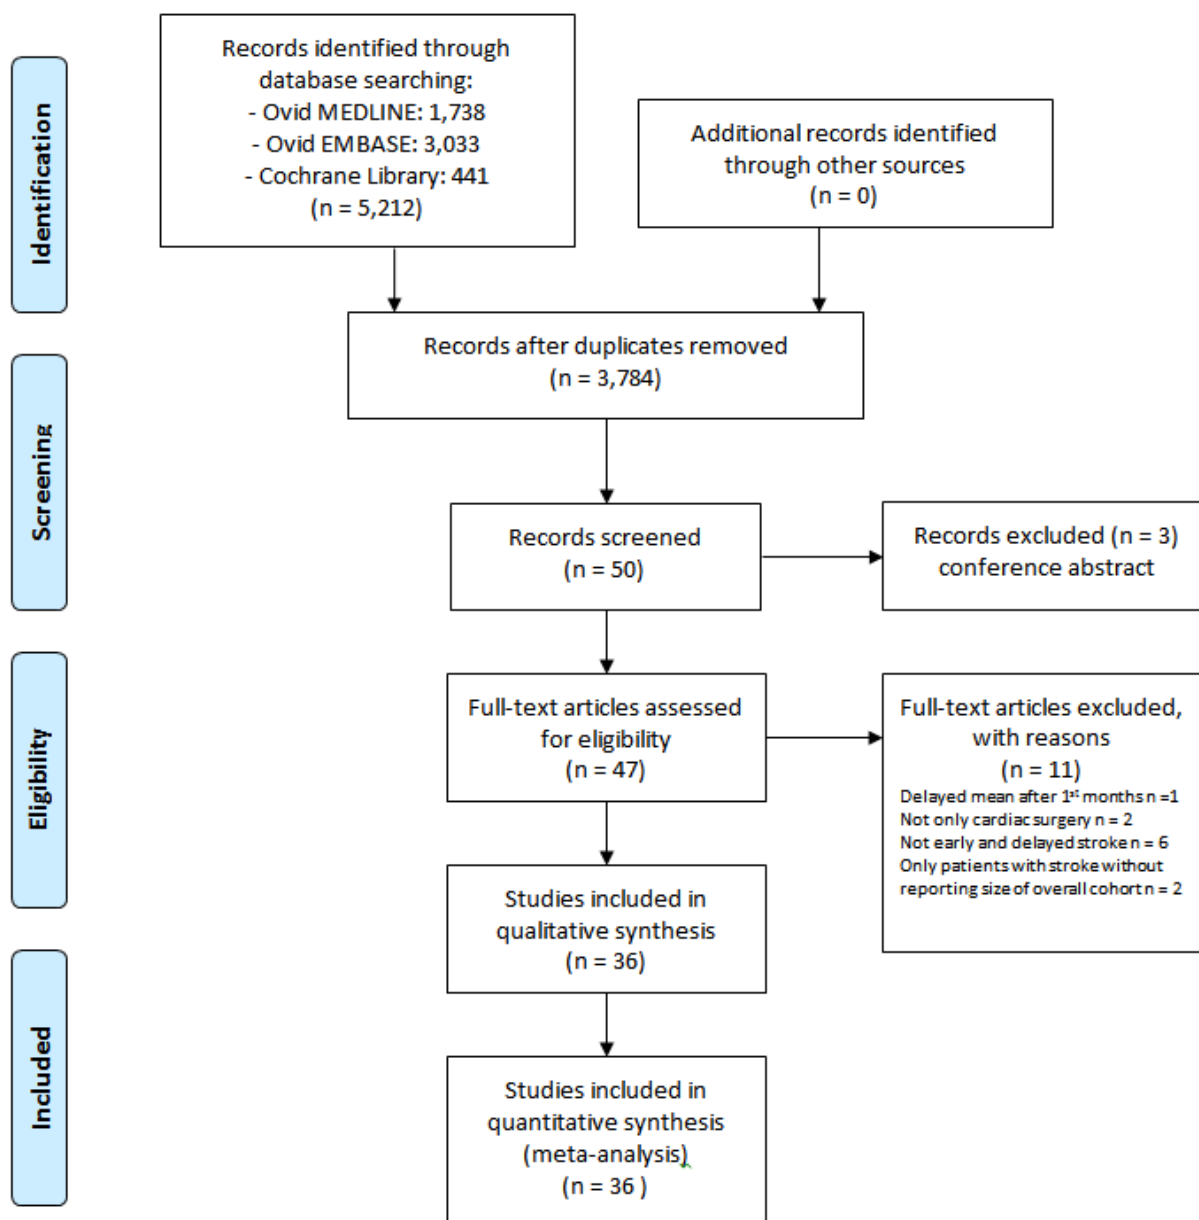



Figure S2. Pooled event rate for perioperative stroke.

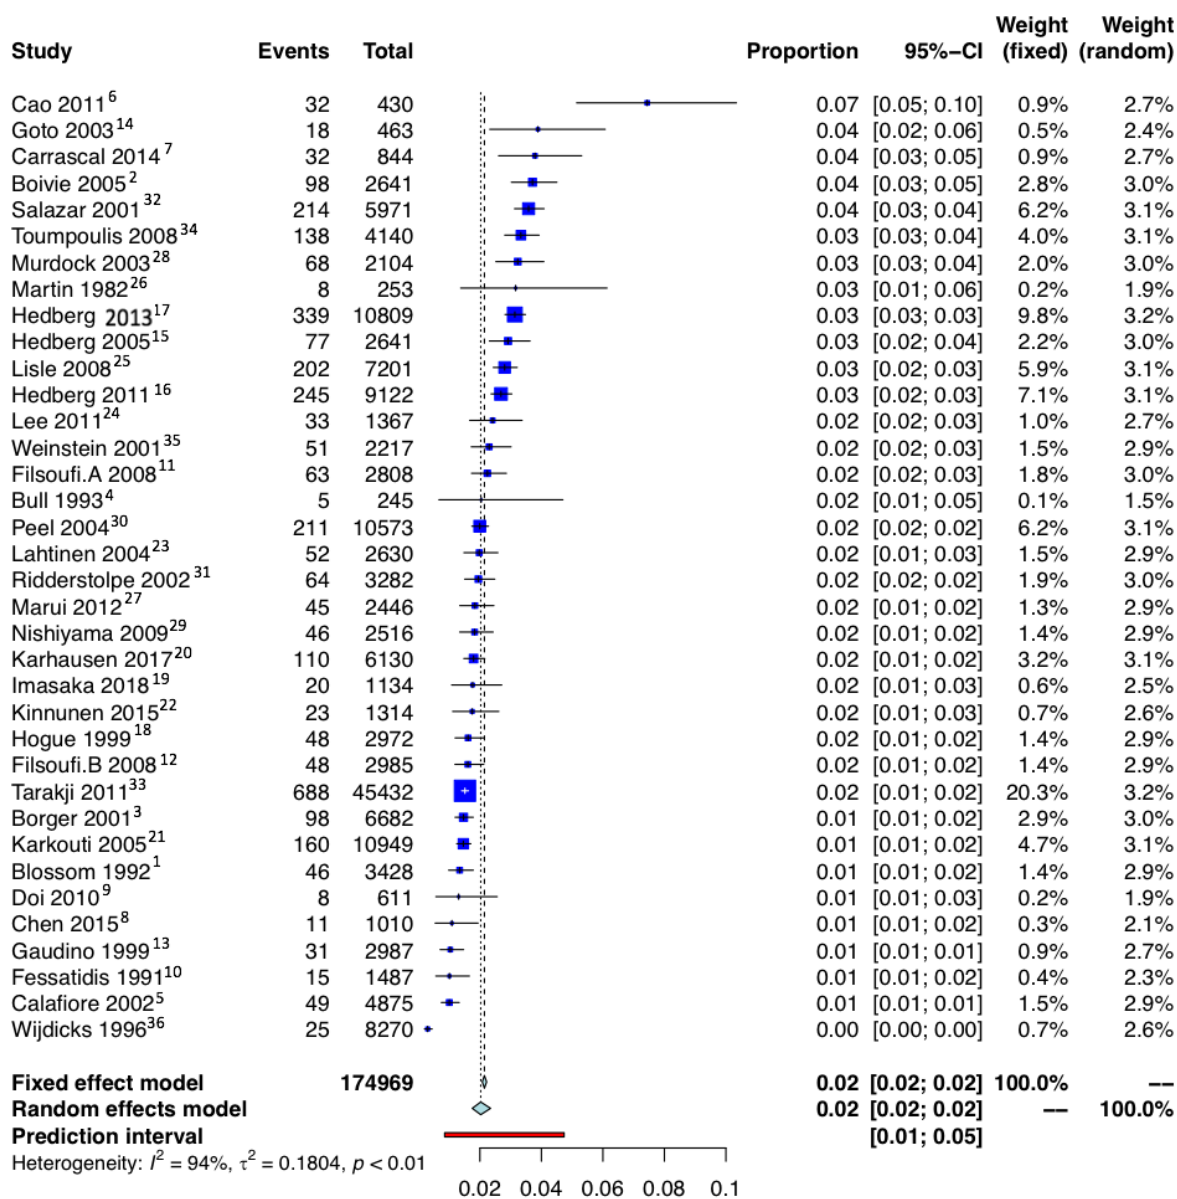

**Figure S3.** Reconstructed Kaplan-Meier survival curves from derived individual patient data (IPD) for A) No stroke versus perioperative stroke and B) No stroke versus early and delayed stroke. Solid/dotted line represents aggregation of all available Kaplan-Meier curves with 95% CI.

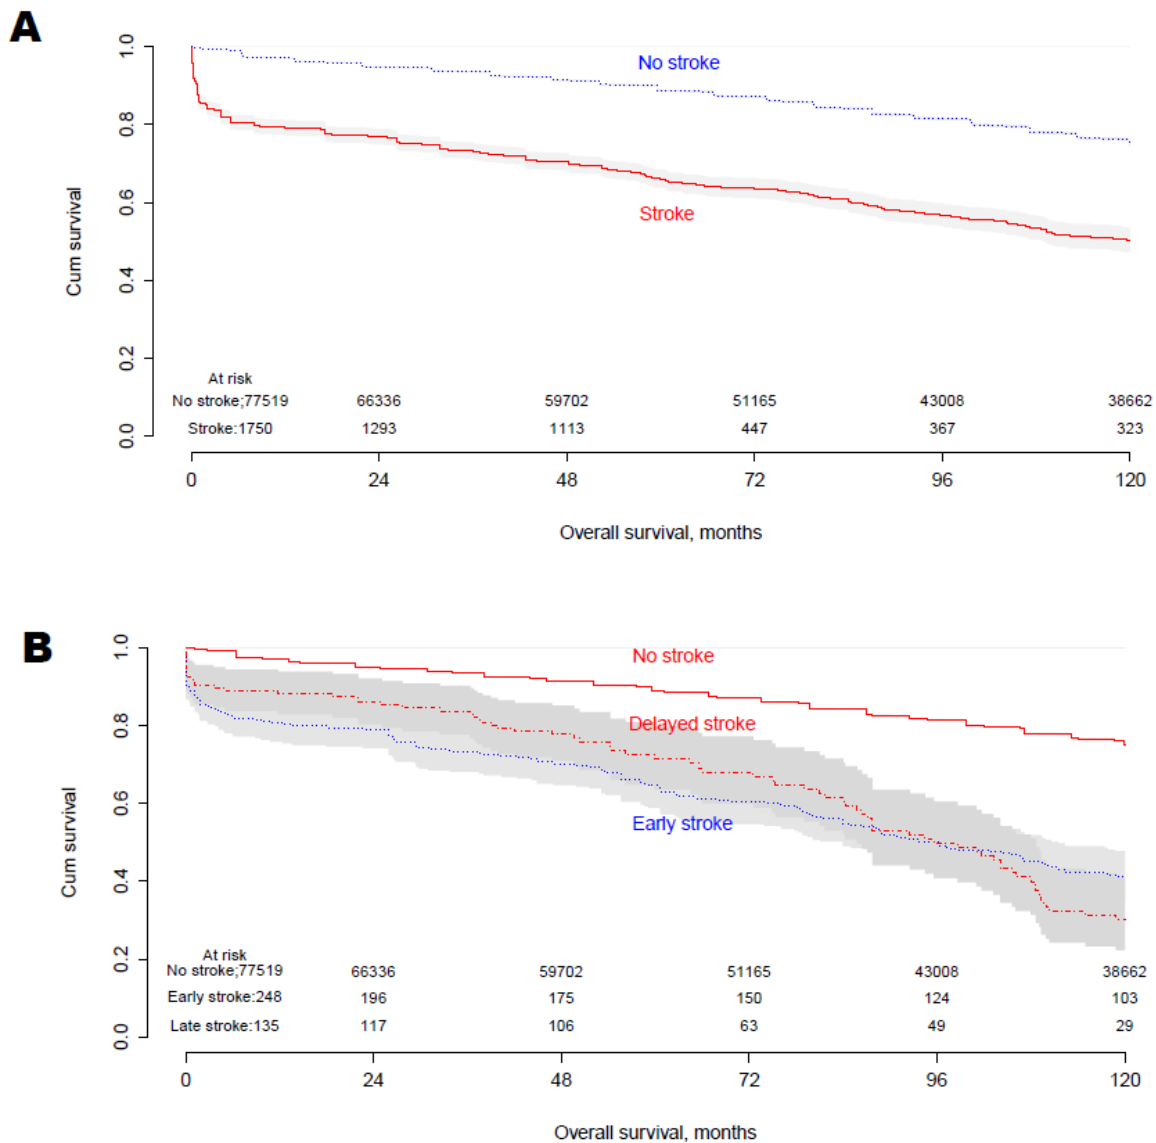

Figure S4. Leave-one-out analysis (top) and funnel plot (bottom) for incidence of A) early stroke and B) delayed stroke.

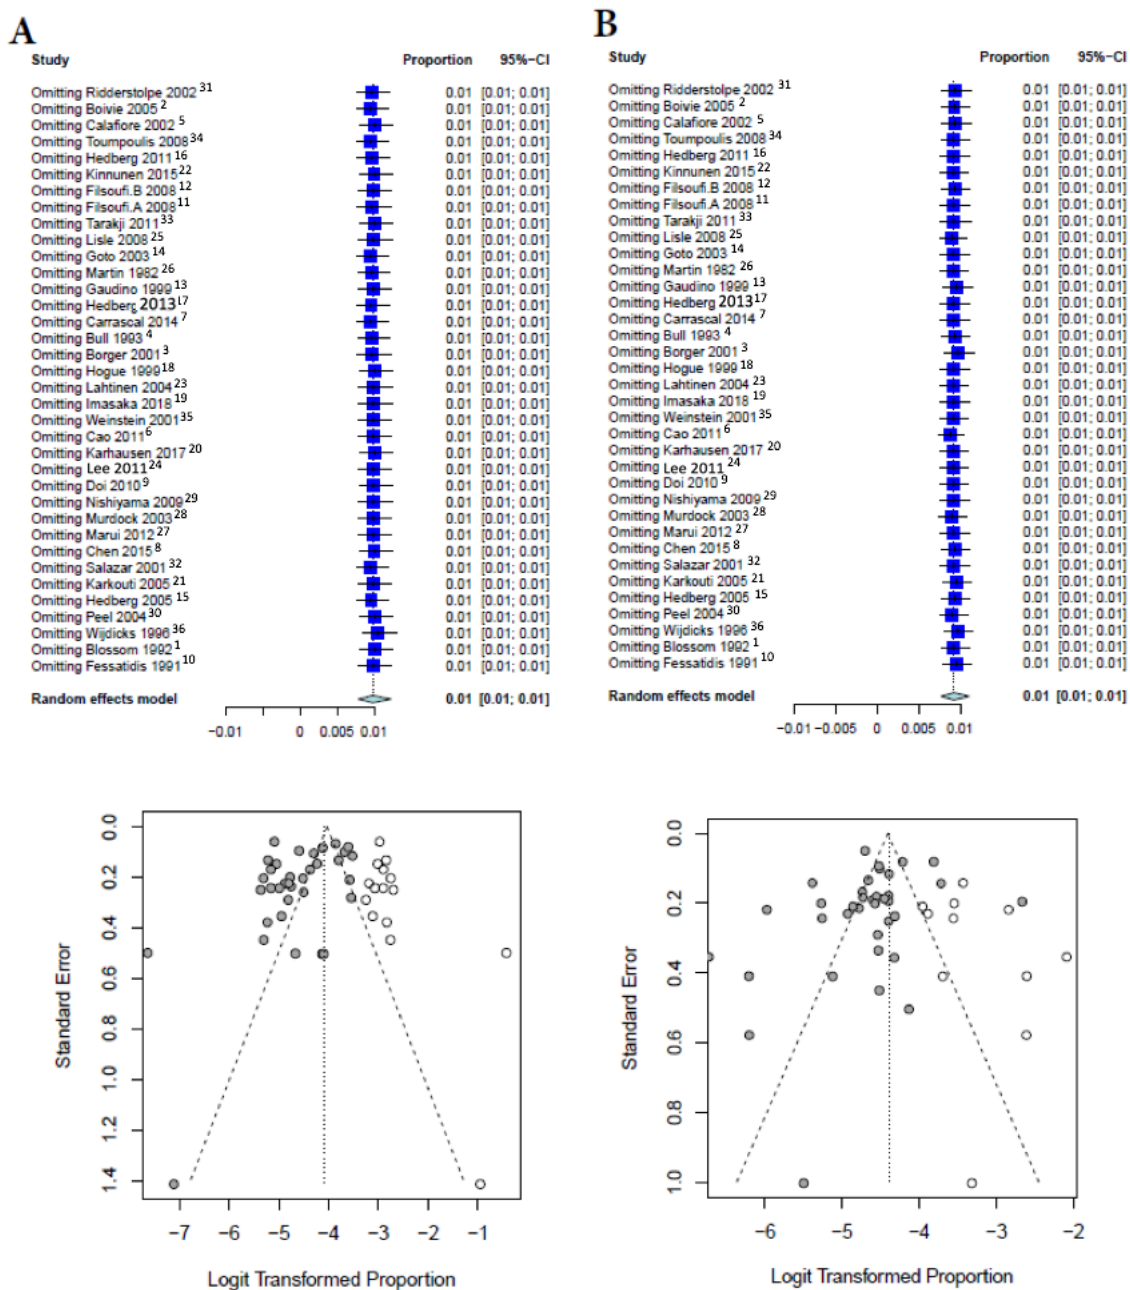

### List of the included studies

1. Blossom GB, Fietsam R, Bassett JS, Glover JL, Bendick PJ. Characteristics of cerebrovascular accidents after coronary artery bypass grafting. *Am Surg*. 1992;58:584–589; discussion 589.
2. Boivie P, Edström C, Engström KG. Side differences in cerebrovascular accidents after cardiac surgery: a statistical analysis of neurologic symptoms and possible implications for anatomic mechanisms of aortic particle embolization. *J Thorac Cardiovasc Surg*. 2005;129:591–598.
3. Borger MA, Ivanov J, Weisel RD, Rao V, Peniston CM. Stroke during coronary bypass surgery: principal role of cerebral macroemboli. *Eur J Cardio-Thorac Surg*. 2001;19:627–632.
4. Bull DA, Neumayer LA, Hunter GC, Keksz J, Sethi GK, McIntyre KE, Bernhard VM. Risk factors for stroke in patients undergoing coronary artery bypass grafting. *Cardiovasc Surg*. 1993;1:182–185.
5. Calafiore AM, Di Mauro M, Teodori G, Di Giammarco G, Cirmeni S, Contini M, Iacò AL, Pano M. Impact of aortic manipulation on incidence of cerebrovascular accidents after surgical myocardial revascularization. *Ann Thorac Surg*. 2002;73:1387–1393.
6. Cao L, Li Q, Bi Q, Yu Q-J. Risk factors for recurrent stroke after coronary artery bypass grafting. *J Cardiothorac Surg*. 2011;6:157.
7. Carrascal Y, Guerrero AL, Blanco M, Valenzuela H, Pareja P, Laguna G. Postoperative stroke related to cardiac surgery in octogenarians. *Interact Cardiovasc Thorac Surg*. 2014;18:596–601.
8. Chen J-W, Lin C-H, Hsu R-B. Mechanisms of early and delayed stroke after systematic off-pump coronary artery bypass. *J Formos Med Assoc*. 2015;114:988–994.
9. Doi K, Yaku H. Importance of cerebral artery risk evaluation before off-pump coronary artery bypass grafting to avoid perioperative stroke. *Eur J Cardio-Thorac Surg*. 2010;38:568–572.
10. Fessatidis I, Prapas S, Hevas A, Didilis V, Alotzeilat A, Missias G, Asteri T, Spyrou P. Prevention of perioperative neurological dysfunction. A six year perspective of cardiac surgery. *J Cardiovasc Surg (Torino)*. 1991;32:570–574.
11. Filsoufi F, Rahmanian PB, Castillo JG, Bronster D, Adams DH. Incidence, topography, predictors and long-term survival after stroke in patients undergoing coronary artery bypass grafting. *Ann Thorac Surg*. 2008;85:862–870.
12. Filsoufi F, Rahmanian PB, Castillo JG, Bronster D, Adams DH. Incidence, imaging analysis, and early and late outcomes of stroke after cardiac valve operation. *Am J Cardiol*. 2008;101:1472–1478.
13. Gaudino M, Martinelli L, Di Lella G, Glieca F, Marano P, Schiavello R, Possati G. Superior extension of intraoperative brain damage in case of normothermic systemic perfusion during coronary artery bypass operations. *J Thorac Cardiovasc Surg*. 1999;118:432–437.
14. Goto T, Baba T, Matsuyama K, Honma K, Ura M, Koshiji T. Aortic atherosclerosis and postoperative neurological dysfunction in elderly coronary surgical patients. *Ann Thorac Surg*. 2003;75:1912–1918.

15. Hedberg M, Boivie P, Edström C, Engström KG. Cerebrovascular accidents after cardiac surgery: an analysis of CT scans in relation to clinical symptoms. *Scand Cardiovasc J*. 2005;39:299–305.
16. Hedberg M, Boivie P, Engström KG. Early and delayed stroke after coronary surgery - an analysis of risk factors and the impact on short- and long-term survival. *Eur J Cardio-Thorac Surg*. 2011;40:379–387.
17. Hedberg M, Engström KG. Stroke after cardiac surgery--hemispheric distribution and survival. *Scand Cardiovasc J*. 2013;47:136–144.
18. Hogue CW, Murphy SF, Schechtman KB, Dávila-Román VG. Risk factors for early or delayed stroke after cardiac surgery. *Circulation*. 1999;100:642–647.
19. Imasaka K-I, Tayama E, Morita S, Tomita Y. Neurological outcome and efficacy of intensive craniocervical screening for elective cardiac surgery. *Interact Cardiovasc Thorac Surg*. 2018;26:216–223.
20. Karhausen JA, Smeltz AM, Akushevich I, Cooter M, Podgoreanu MV, Stafford-Smith M, Martinelli SM, Fontes ML, Kertai MD. Platelet Counts and Postoperative Stroke After Coronary Artery Bypass Grafting Surgery. *Anesth Analg*. 2017;125:1129–1139.
21. Karkouti K, Djaiani G, Borger MA, Beattie WS, Fedorko L, Wijeyesundera D, Ivanov J, Karski J. Low hematocrit during cardiopulmonary bypass is associated with increased risk of perioperative stroke in cardiac surgery. *Ann Thorac Surg*. 2005;80:1381–1387.
22. Kinnunen E-M, Juvonen T, Biancari F. Use of Blood Products and Diseased Ascending Aorta Are Determinants of Stroke After Off-Pump Coronary Artery Bypass Grafting. *J Cardiothorac Vasc Anesth*. 2015;29:1180–1186.
23. Lahtinen J, Biancari F, Salmela E, Mosorin M, Satta J, Rainio P, Rimpiläinen J, Lepojärvi M, Juvonen T. Postoperative atrial fibrillation is a major cause of stroke after on-pump coronary artery bypass surgery. *Ann Thorac Surg*. 2004;77:1241–1244.
24. Lee E-J, Choi K-H, Ryu J-S, Jeon S-B, Lee S-W, Park S-W, Park S-J, Lee J-W, Choo S-J, Chung C-H, Jung S-H, Kang D-W, Kim JS, Kwon SU. Stroke risk after coronary artery bypass graft surgery and extent of cerebral artery atherosclerosis. *J Am Coll Cardiol*. 2011;57:1811–1818.
25. Lisle TC, Barrett KM, Gazoni LM, Swenson BR, Scott CD, Kazemi A, Kern JA, Peeler BB, Kron IL, Johnston KC. Timing of stroke after cardiopulmonary bypass determines mortality. *Ann Thorac Surg*. 2008;85:1556–1562; discussion 1562-1563.
26. Martin WR, Hashimoto SA. Stroke in coronary bypass surgery. *Can J Neurol Sci*. 1982;9:21–26.
27. Marui A, Kimura T, Tanaka S, Okabayashi H, Komiya T, Furukawa Y, Kita T, Sakata R, CREDO-Kyoto Investigators. Comparison of frequency of postoperative stroke in off-pump coronary artery bypass grafting versus on-pump coronary artery bypass grafting versus percutaneous coronary intervention. *Am J Cardiol*. 2012;110:1773–1778.

28. Murdock DK, Rengel LR, Schlund A, Olson KJ, Kaliebe JW, Johnkoski JA, Riveron FA. Stroke and atrial fibrillation following cardiac surgery. *WMJ*. 2003;102:26–30.
29. Nishiyama K, Horiguchi M, Shizuta S, Doi T, Ehara N, Tanuguchi R, Haruna Y, Nakagawa Y, Furukawa Y, Fukushima M, Kita T, Kimura T. Temporal pattern of strokes after on-pump and off-pump coronary artery bypass graft surgery. *Ann Thorac Surg*. 2009;87:1839–1844.
30. Peel GK, Stamou SC, Dullum MKC, Hill PC, Jablonski KA, Bafi AS, Boyce SW, Petro KR, Corso PJ. Chronologic distribution of stroke after minimally invasive versus conventional coronary artery bypass. *J Am Coll Cardiol*. 2004;43:752–756.
31. Ridderstolpe L, Ahlgren E, Gill H, Rutberg H. Risk factor analysis of early and delayed cerebral complications after cardiac surgery. *J Cardiothorac Vasc Anesth*. 2002;16:278–285.
32. Salazar JD, Wityk RJ, Grega MA, Borowicz LM, Doty JR, Petrofski JA, Baumgartner WA. Stroke after cardiac surgery: short- and long-term outcomes. *Ann Thorac Surg*. 2001;72:1195–1201; discussion 1201-1202.
33. Tarakji KG, Sabik JF, Bhudia SK, Batizy LH, Blackstone EH. Temporal onset, risk factors, and outcomes associated with stroke after coronary artery bypass grafting. *JAMA*. 2011;305:381–390.
34. Toumpoulis IK, Anagnostopoulos CE, Chamogeorgakis TP, Angouras DC, Kariou MA, Swistel DG, Rokkas CK. Impact of early and delayed stroke on in-hospital and long-term mortality after isolated coronary artery bypass grafting. *Am J Cardiol*. 2008;102:411–417.
35. Weinstein GS. Left hemispheric strokes in coronary surgery: implications for end-hole aortic cannulas. *Ann Thorac Surg*. 2001;71:128–132.
36. Wijdicks EF, Jack CR. Coronary artery bypass grafting-associated ischemic stroke. A clinical and neuroradiological study. *J Neuroimaging*. 1996;6:20–22.
